# Supplementary material for: High polymorphism in MHC-DRB genes in golden snub-nosed monkeys reveals balancing selection in small, isolated populations
Source: PubMed Central journal article supplement (PMC5851093; doi:10.1186/s12862-018-1148-7), 2018-03-13
Supplement: 12862_2018_1148_MOESM1_ESM.pdf [file 12862_2018_1148_MOESM1_ESM.pdf]

|             | 10    | 20         | 30         | 40         | 50         | 60              | 70          | 80         |
|-------------|-------|------------|------------|------------|------------|-----------------|-------------|------------|
|             | ....  | .....      | .....      | .....      | .....      | .....           | .....       | .....      |
|             |       |            |            |            |            | *               | ** **       | ** **      |
|             | + + + |            | + + +      | ++         | +          | + +             | + + +       | + + +      |
| Rhro-DRB*01 | RFLEQ | FKSECHFFNG | TERVRYLQRY | FYNQEEYVRF | DSDVGEFRAV | TELGRPVAEN      | FNSQKDFLEQ  | RAQVDNYCR  |
| Rhro-DRB*02 | ..... | V.F.....   | .....F.E.R | VH.....A.. | .....E.    | .....D..Y       | W.G...L..D  | ...S.....  |
| Rhro-DRB*03 | ..... | V.Y.....   | .....L.E.H | .....FL..  | .....Y...  | .....W..RR.Y... | ...A..T...  | .....      |
| Rhro-DRB*04 | ..... | A.....     | .....F.D.. | IH.R.....  | .....      | .....D..Y       | W..R..I..R  | A..A..TV.. |
| Rhro-DRB*05 | ...Y  | ST.....    | .....F.D.. | .....      | .....Y...  | .....D...       | W.....I..D  | ...A..TF.. |
| Rhro-DRB*06 | ..... | V.F.....   | .....F.E.R | VH.....A.. | .....E.    | .....D..Y       | W.G...L..D  | ...A.....  |
| Rhro-DRB*07 | ..... | V.H.....   | .....F.D.. | IS....N... | .....Y...  | .....D...       | W.....V...  | E..A..T... |
| Rhro-DRB*08 | ...W. | P.R.....   | .....F.D.. | .....      | .....Y.E.  | .....RS..Y      | W.....I..R  | A..A..T... |
| Rhro-DRB*09 | ...Q. | G.A.....   | ...Q..E..  | I.....     | .....Y...  | .....D...       | W.....L..D  | ...S..T... |
| Rhro-DRB*10 | ...Q. | G.A.....   | ...Q..E..  | I....LL..  | .....      | .....           | W.....I..D  | ..R..I-..  |
| Rhro-DRB*11 | ...Q. | G.A.....   | ...Q..E.H  | I....FL..  | .....      | .....           | W.....L..D  | ..S..T...  |
| Rhro-DRB*12 | ...Y  | ST.....    | .....F.D.. | .....      | .....      | .....D..Y       | W.....L..RK | ..E..TF..  |
| Rhro-DRB*13 | ...Q. | G.A.....   | ...Q..E.H  | I....F...  | .....      | .....           | W.....L..D  | ..S..T...  |
| Rhro-DRB*14 | ..... | A.C.....   | .....F.E.R | VH.R...A.. | .....Y...  | .....D.KY       | W.....L..R. | ..A..TF..  |
| Rhro-DRB*15 | ...W. | Y.P.....   | .....L.E.. | .....N...  | .....Y...  | .....D...       | W..RR.L...  | ..E..TV..  |
| Rhro-DRB*16 | ..... | V.H.....   | .....F.D.. | .....      | .....Y.E.  | .....RS..Y      | W.....I..RA | ..A..T...  |
| Rhro-DRB*17 | ...W. | P.R.....   | .....F.D.. | .....F...  | .....Y...  | .....           | L..R.....A  | L.A.....   |
| Rhro-DRB*18 | ...Y  | TT.....    | .....F.D.. | .....      | .....      | .....RS..Y      | W.....D.    | ..S..T...  |
| Rhro-DRB*19 | ...Q. | G.A.Y....  | ...Q..E.H  | I....FA..  | .....      | .....           | W.....L..D  | ..S..T...  |
| Rhro-DRB*20 | ...Y  | ST.....    | .....F.D.. | .....      | .....Y.E.  | .....D..Y       | W..R..I..DK | ..A..TV..  |
| Rhro-DRB*21 | ..... | A.....     | .....F.D.. | .....      | .....      | .....RS..Y      | W.....L..RK | Q.A..T...  |
| Rhro-DRB*22 | ..... | A.....     | .....F.D.. | IH.R.....  | .....      | .....D..Y       | W..R..I..RA | ..A..TV..  |
| Rhro-DRB*23 | ...K. | D.H.....   | .....H.D   | I....DL..  | .....Y...  | .....D..Y       | W.....      | ..E..K-..  |
| Rhro-DRB*24 | ..... | .....      | .....      | .....A..   | .....      | .....           | .....       | ..C...     |
| Rhro-DRB*25 | ...Q. | G.A.....   | ...Q..E.H  | I....F...  | .....      | .....           | W.....L..D  | ..S..T...  |
| Rhro-DRB*26 | ...Y  | ST.....    | .....F.D.. | .....      | .....E.    | .....RS..Y      | G.....I..RA | ..A..T...  |
| Rhro-DRB*27 | ..... | V.H.....   | .....F.D.. | IS....N... | .....Y...  | .....D...       | W.....V...E | ..A..T...  |
| Rhro-DRB*28 | ..... | V.H.....   | .....F.D.. | IS....N... | .....Y...  | .....D...       | W.....V...E | ..A..T...  |
| Rhro-DRB*29 | ..... | A.....     | .....      | .....      | .....      | .....           | .....       | .....      |
| Rhro-DRB*30 | ..... | V.Y.....   | .....L.E.H | .....FL..  | .....Y...  | .....           | W..RR.Y...  | ..A..T...  |
| Rhro-DRB*31 | ...Y  | TT.....    | .....F.D.. | .....      | .....      | .....RS..Y      | W.G.....D.  | ..S..T...  |
| Rhro-DRB*32 | .S.W. | Y.P.....   | .....L.E.. | .....N...  | .....Y...  | .....D...       | W..RR.L...  | ..E..TV..  |
| Rhro-DRB*33 | ..... | A.Y.....   | .....L.E.H | .....FL..  | .....      | .....RS..Y      | W.....      | ..A..T...  |
| Rhro-DRB*34 | ..... | A.....     | .....L.E.H | .....FL..  | .....Y...  | .....           | W..RR.Y...  | ..A..T...  |
| Rhro-DRB*35 | ..... | V.H.....   | .....F.D.. | IS....N... | .....Y...  | .....D...       | W.....L..D  | ..S..T...  |
| Rhro-DRB*36 | P..W. | P.R.....   | .....F.D.. | .....      | .....Y.E.  | .....RS..Y      | W.....I..RA | ..A..T...  |
| Rhro-DRB*37 | ...K. | D.H.....   | .....H.D   | I....DL..  | .....Y...  | .....D..Y       | W.....I..D. | ..A..T...  |
| Rhro-DRB*38 | ..... | V.F.....   | .....F.E.H | .....FL..  | .....Y.E.  | .....D..Y       | W.G...L..D  | ..A.....   |
| Rhro-DRB*39 | ..... | A.....     | .....F.D.. | IH.R..FL.. | .....      | .....D..Y       | W..R..I..RA | ..A..TV..  |
| Rhro-DRB*40 | ..... | A.....     | .....F.D.. | .....      | .....Y.E.  | .....RS..Y      | W.....I..RA | ..A..T...  |
| Rhro-DRB*41 | ...Q. | G.A.....   | ...Q..E..  | I.....     | .....Y...  | .....D...       | W.....L...A | L.A.....   |
| Rhro-DRB*42 | ...Q. | G.A.....   | ...Q..E..  | I....FL..  | .....      | .....D..Y       | W..R..I..RA | ..A..TV..  |
