# Supplementary material for: High polymorphism in MHC-DRB genes in golden snub-nosed monkeys reveals balancing selection in small, isolated populations
Source: PubMed Central journal article supplement (PMC5851093; doi:10.1186/s12862-018-1148-7), 2018-03-13

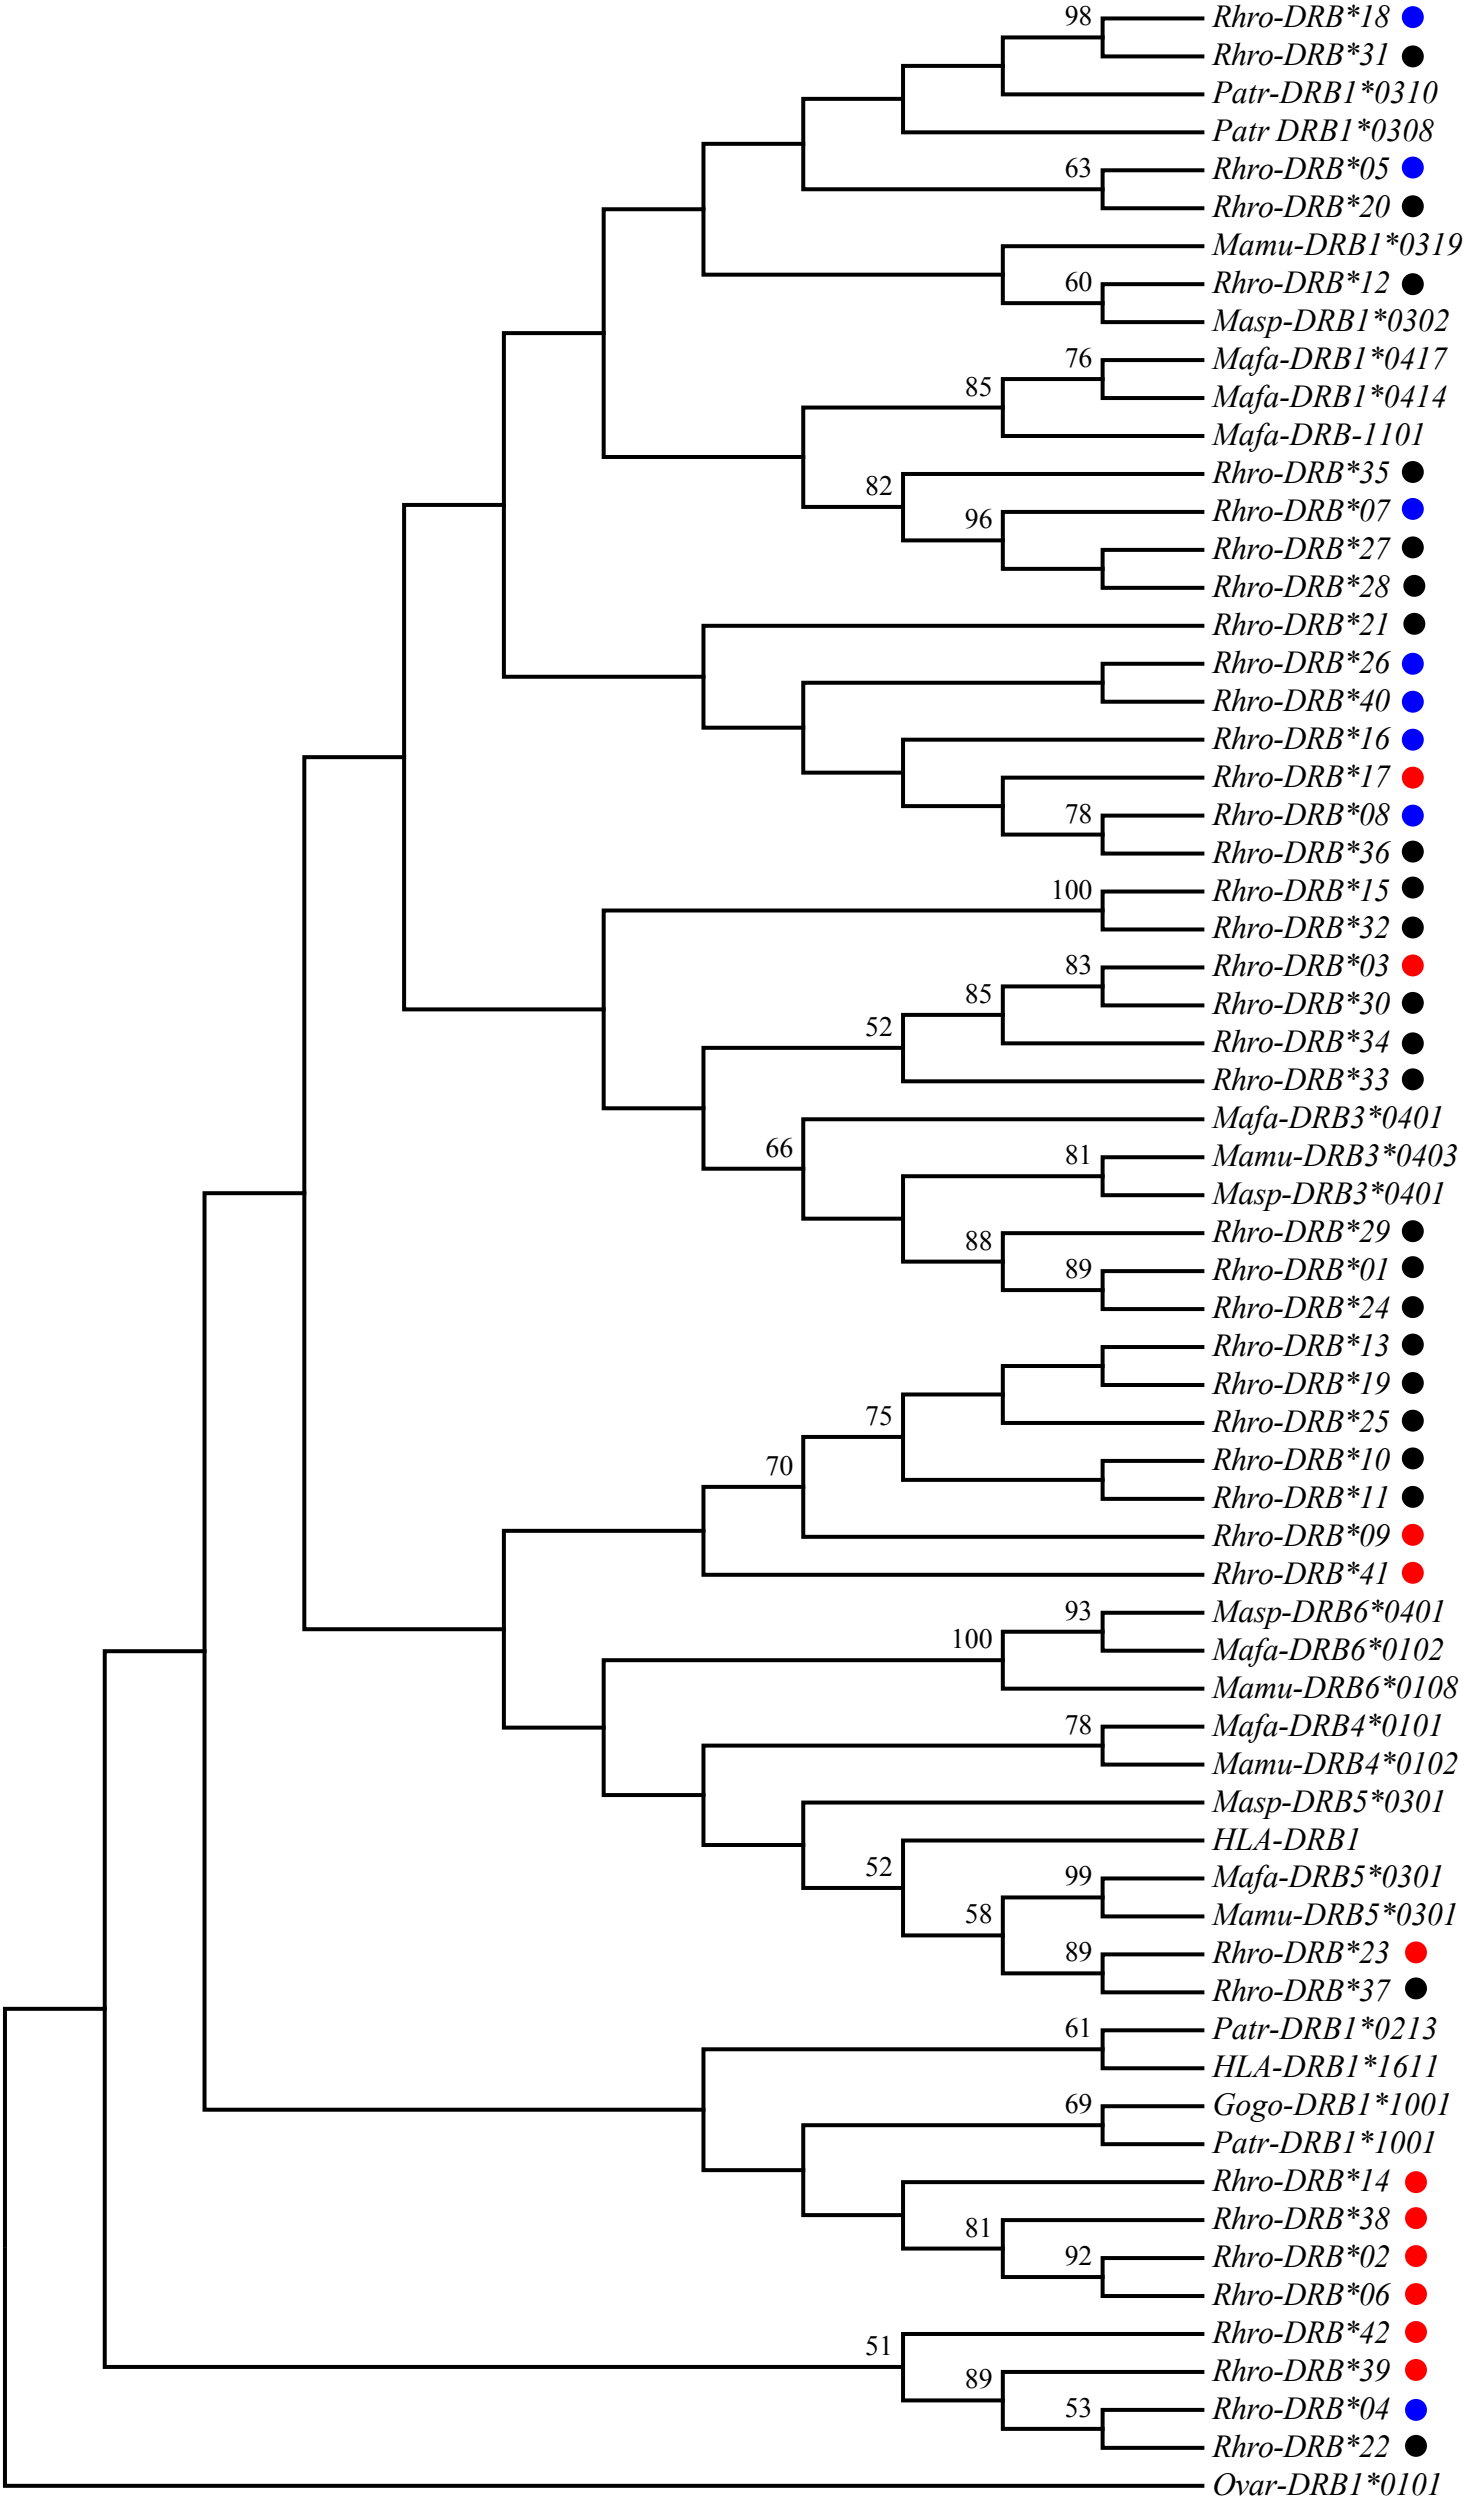

Supplement: 12862_2018_1148_MOESM2_ESM.pdf [file 12862_2018_1148_MOESM2_ESM.pdf]
